# Supplementary material for: The photophysics of 7-(diethylamino)coumarin-3-carboxylic acid N-succinimidyl ester in reverse micelle: excitation wavelength dependent dynamics
Source: Royal Society of Chemistry journal article supplement (doi:10.1039/c3ra44240c), 2013-10-23
Supplement: c3ra44240c.pdf [file c3ra44240c.pdf]

# Supporting Information

## The Photophysics of 7-(diethylamino)coumarin-3-carboxylic acid N-Succinimidyl Ester in Reverse Micelle: An excitation wavelength dependent dynamics

Banibrata Maity, Aninda Chatterjee and Debabrata Seth\*

Department of Chemistry,  
Indian Institute of Technology,  
Patna 800013, Bihar, INDIA

E-mail : debabrata@iitp.ac.in; Fax : 91-612-2277383

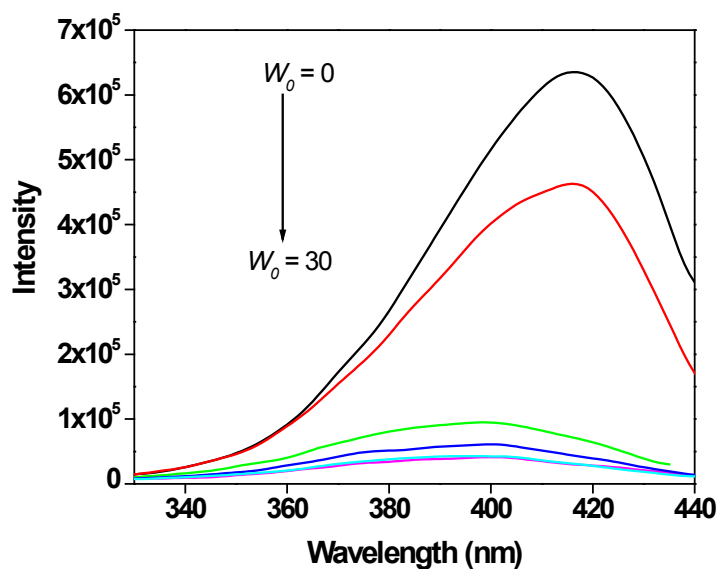

Figure S1. Excitation spectra of 7-DCCAE in reverse micelles.

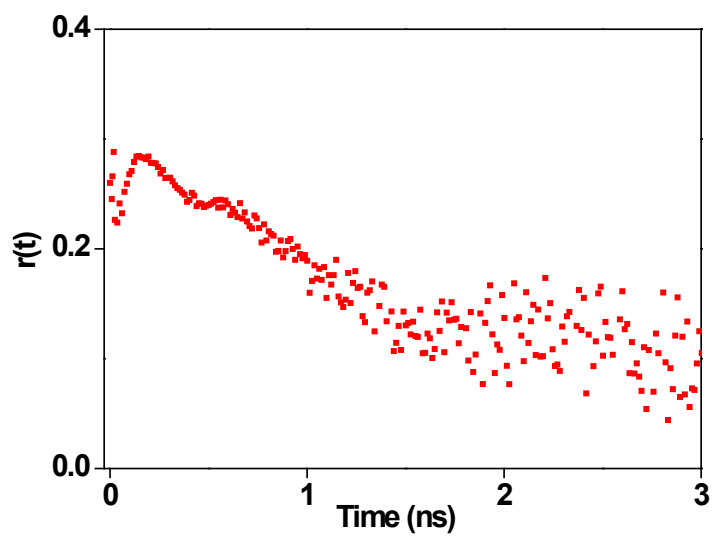

**Figure S2.** The time resolved anisotropy decays of 7-DCCAE in isooctane/water/AOT reverse micelles at  $w_0 = 30$  ( $\lambda_{\text{exi}} = 445\text{nm}$ ) shows “dip-rise-dip” kind of profile.
